# Supplementary material
Source: PubMed Central journal article supplement (PMC3906807)

**Supplementary Figure 1.** Comparison of the genomes of *Dehalococcoides mccartyi* strains CBDB1 (Figure 1A), 195 (Figure 1B), VS (Figure 1C) and *Dehalogenimonas lykanthroporepellens* strain BL-DC-9 (Figure 1D) to protein sequences derived from the single cell DEH-J10 and *Dehalococcoidia*-derived reductive dehalogenase protein A homologs (rdhA). Protein sequences for rdhA were retrieved from the genomes of *Dehalococcoides mccartyi* strains 195, CBDB1, BAV1 and KB1, and *Dehalogenimonas lykanthroporepellens* strain BL-DC-9. Circles from inside to outside: i) GC skew (filled green and purple); ii) GC content (filled black); iii) BLASTX hits for rdh to genome of interest (green bars); BLASTX hits for all protein sequences from single cell DEH-J10 (pink bars). Bar heights are proportional to the percent identity of the hit. Darker bars represent multiple overlapping hits. BLASTX comparisons were made with an e-value threshold of  $10^{-10}$ . Figures were produced using GCView Server: [http://stothard.afns.ualberta.ca/cgview\\_server/](http://stothard.afns.ualberta.ca/cgview_server/).

**Supplementary Figure 1A.** *Dehalococcoides mccartyi* strain CBDB1 compared to DEH-J10 proteins and reductive dehalogenase protein A homologs (rdhA).

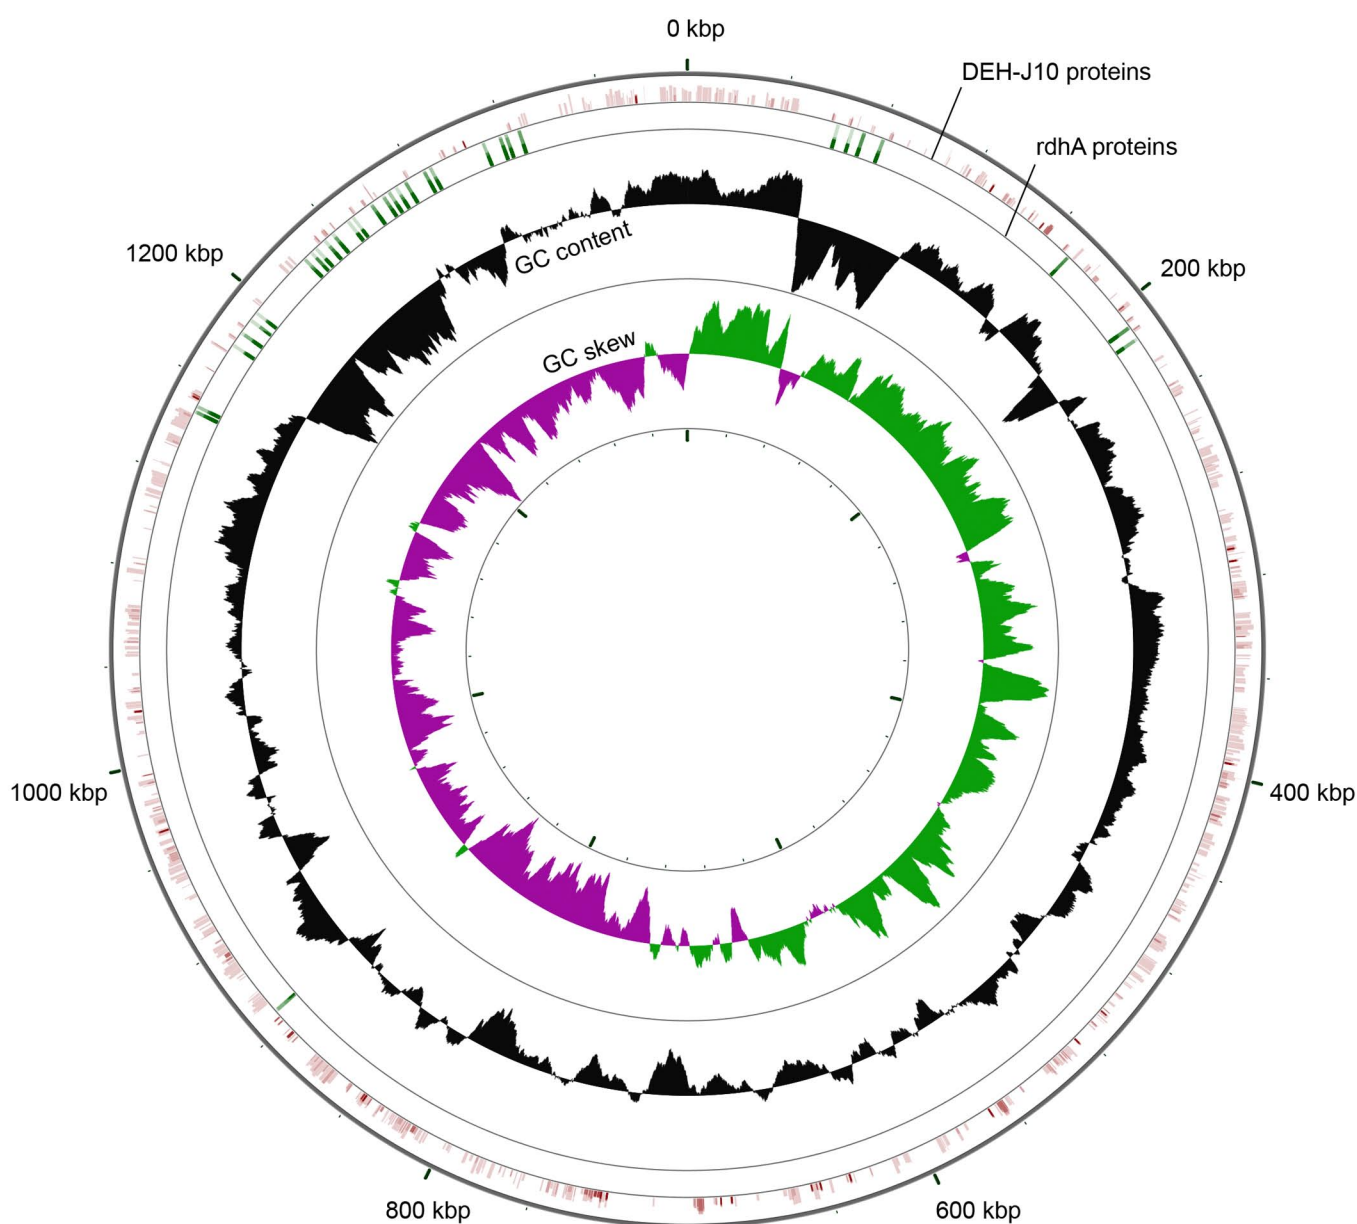

**Supplementary Figure 1B.** *Dehalococcoides mccartyi* strain 195 compared to DEH-J10 proteins and reductive dehalogenase protein A homologs (rdhA).

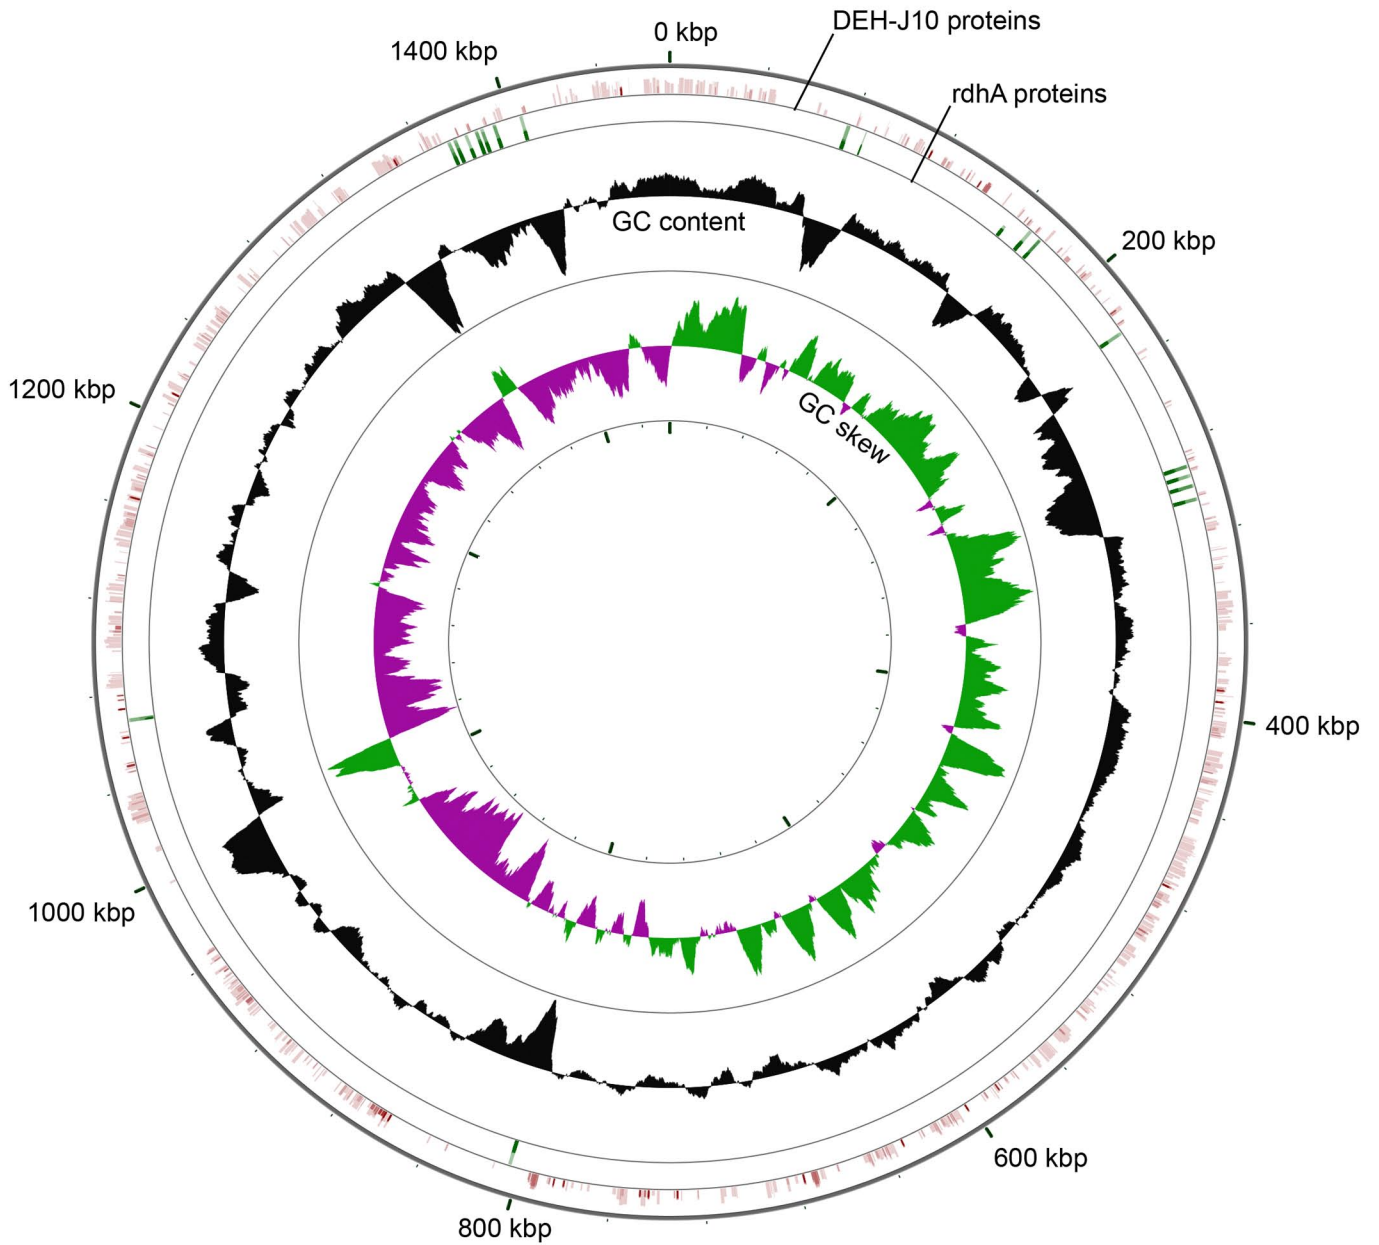

**Supplementary Figure 1C.** *Dehalococcoides mccartyi* strain VS compared to DEH-J10 proteins and reductive dehalogenase protein A homologs (rdhA).

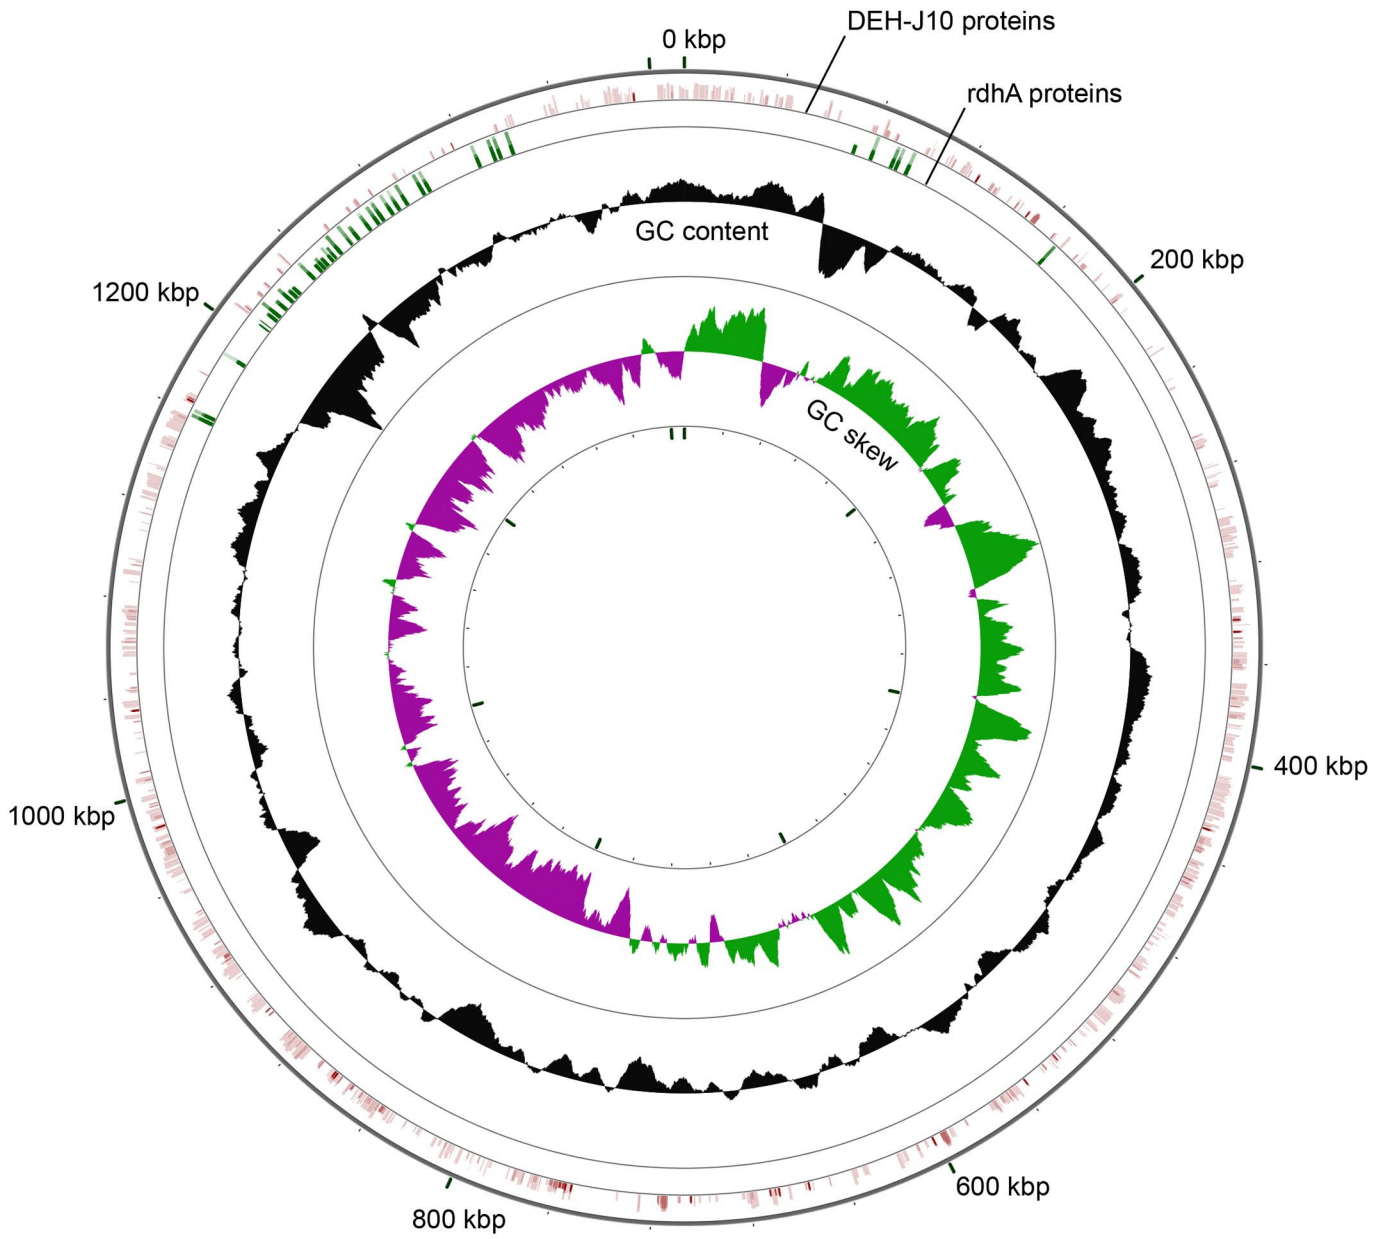

**Supplementary Figure 1D.** *Dehalogenimonas lykanthroporepellens* strain BL-DC-9 compared to DEH-J10 proteins and reductive dehalogenase protein A homologs (rdhA).

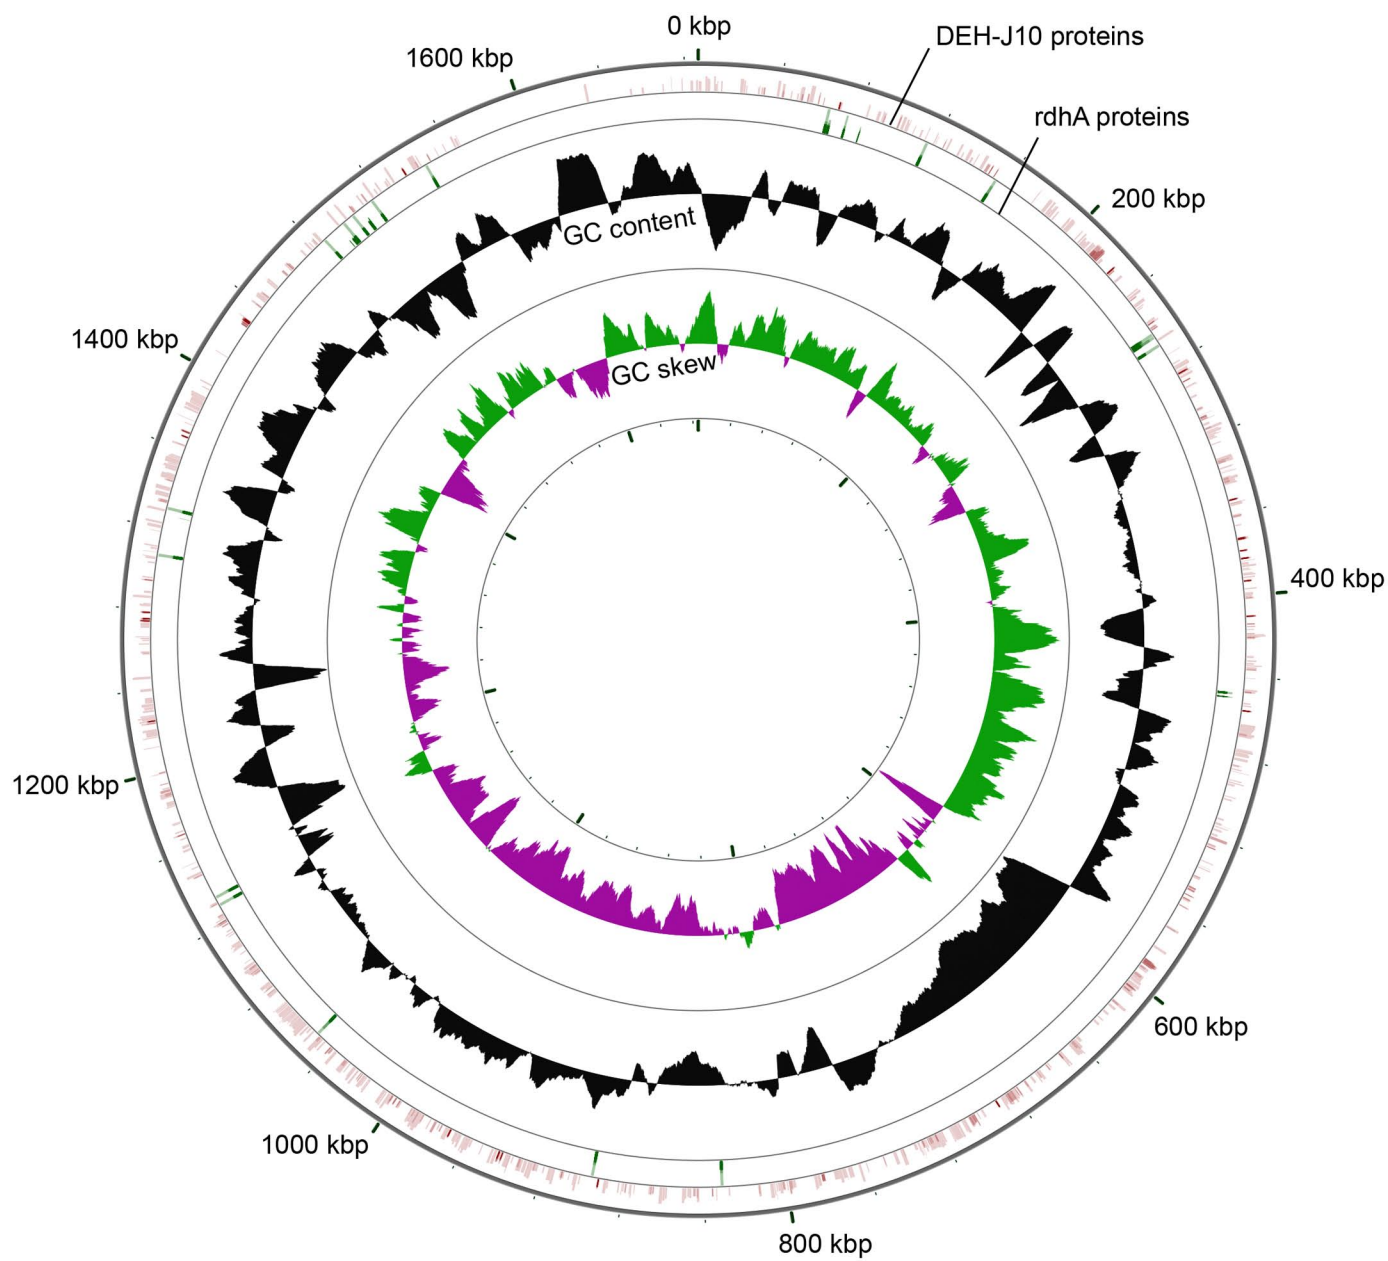

Supplement: ismej2013143x1.pdf [file ismej2013143x1.pdf]
