# Supplementary material
Source: PubMed Central journal article supplement (PMC3906807)

**Supplementary Figure 3.** Representation of ORF arrangement for a contig containing heterodisulfide reductase-like proteins and associated. Putative redox active sites are highlighted in red. Abbreviations: mvhD = methyl viologen-reducing hydrogenase delta subunit; FDH = formate dehydrogenase; hdrA = heterodisulfide reductase-like alpha subunit; sirA = 'sporulation inhibitor of replication protein'.

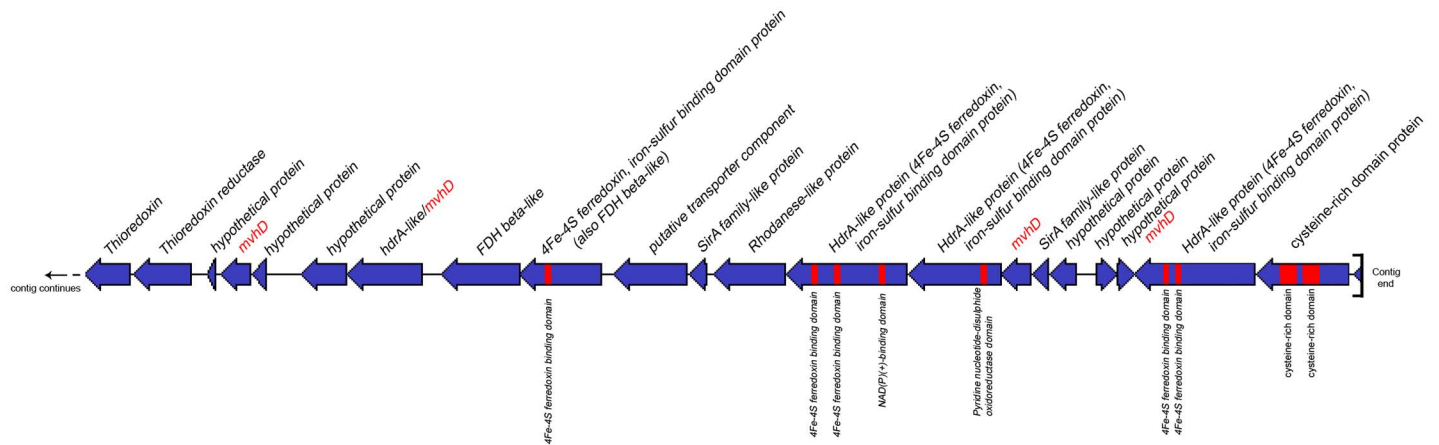

Supplement: ismej2013143x3.pdf [file ismej2013143x3.pdf]
