# Supplementary material
Source: PubMed Central journal article supplement (PMC3906807)
Supplement: ismej2013143x5.pdf [file ismej2013143x5.pdf]

**Supplementary Table 1.** Summary of the best BLASTP hits of predicted proteins from single cell DEH-J10 to proteins in the NCBI-nr database using an e-value threshold of  $10^{-5}$ .

| <b>Phylogenetic group</b>                   | <b>No. of hits</b> | <b>% of hits</b> |
|---------------------------------------------|--------------------|------------------|
| <i>Dehalococcoides mccartyi</i>             | 214                | 13.7             |
| <i>Dehalogenimonas lykanthroporepellens</i> | 84                 | 5.4              |
| Other <i>Chloroflexi</i>                    | 56                 | 3.6              |
| <i>Deltaproteobacteria</i> <sup>a</sup>     | 101                | 6.5              |
| <i>Firmicutes</i> <sup>b</sup>              | 65                 | 4.2              |
| Methanogenic <i>Archaea</i>                 | 65                 | 4.2              |
| Syntrophs <sup>c</sup>                      | 24                 | 1.5              |
| No hits                                     | 449                | 28.8             |
| Total queries                               | 1557               | 100              |

<sup>a</sup> Does not include hits to syntrophic *Deltaproteobacteria*

<sup>b</sup> Does not include hits to syntrophic *Pelotomaculum* spp.

<sup>c</sup> Syntrophs include: *Syntrophus aciditrophicus*, *Syntrophothermus lipocalidus*, *Syntrophobacter fumaroxidans*, *Pelotomaculum thermopropionicum*.
